# Supplementary material for: Development of a three-dimensional-micro-pulling-down method and growth of spring-shaped sapphire single crystals
Source: Royal Society of Chemistry journal article supplement (doi:10.1039/d4ce00560k), 2024-01-01
Supplement: d4ce00560k1.zip [file d4ce00560k1.zip]

## Sheet: Sheet1
	w	intensity		w	intensity
	18.6971	-14.253		18.9788	78
	18.6972	88.7557		18.9798	78
	18.6973	5.09768		18.9808	59
	18.6974	41.4397		18.9818	88
	18.6975	11.1151		18.9828	70
	18.6976	110.79		18.9838	78
	18.6977	37.1324		18.9848	81
	18.6978	46.8078		18.9858	75
	18.6979	43.1498		18.9868	75
	18.698	112.825		18.9878	85
	18.6981	55.8339		18.9888	69
	18.6982	52.1759		18.9898	79
	18.6983	81.8512		18.9908	87
	18.6984	-1.80672		18.9918	80
	18.6985	114.535		18.9928	81
	18.6986	57.544		18.9938	93
	18.6987	-16.114		18.9948	67
	18.6988	33.5614		18.9958	83
	18.6989	39.9034		18.9968	90
	18.699	-10.4212		18.9978	80
	18.6991	-30.7459		18.9988	95
	18.6992	72.6577		18.9998	89
	18.6993	56.0614		19.0008	94
	18.6994	52.7983		19.0018	97
	18.6995	66.2019		19.0028	116
	18.6996	49.6056		19.0038	95
	18.6997	96.3425		19.0048	85
	18.6998	106.413		19.0058	108
	18.6999	69.8164		19.0068	104
	18.7	106.553		19.0078	103
	18.7001	86.6237		19.0088	95
	18.7002	120.027		19.0098	70
	18.7003	76.7642		19.0108	108
	18.7004	66.8345		19.0118	86
	18.7005	90.2381		19.0128	95
	18.7006	50.3084		19.0138	97
	18.7007	73.7121		19.0148	111
	18.7008	113.782		19.0158	92
	18.7009	77.186		19.0168	77
	18.701	83.9229		19.0178	98
	18.7011	63.9932		19.0188	100
	18.7012	44.0635		19.0198	86
	18.7013	4.13381		19.0208	121
	18.7014	44.2041		19.0218	101
	18.7015	50.9411		19.0228	104
	18.7016	164.345		19.0238	101
	18.7017	114.415		19.0248	118
	18.7018	174.485		19.0258	100
	18.7019	121.222		19.0268	113
	18.702	97.9592		19.0278	112
	18.7021	61.3628		19.0288	110
	18.7022	118.1		19.0298	106
	18.7023	48.1701		19.0308	110
	18.7024	91.5737		19.0318	105
	18.7025	98.3107		19.0328	127
	18.7026	101.714		19.0338	109
	18.7027	45.1179		19.0348	116
	18.7028	165.188		19.0358	101
	18.7029	95.2585		19.0368	110
	18.703	78.6621		19.0378	126
	18.7031	72.0658		19.0388	95
	18.7032	102.136		19.0398	109
	18.7033	145.54		19.0408	144
	18.7034	98.9433		19.0418	112
	18.7035	175.68		19.0428	134
	18.7036	105.751		19.0438	115
	18.7037	169.154		19.0448	149
	18.7038	115.891		19.0458	137
	18.7039	115.962		19.0468	106
	18.704	179.365		19.0478	124
	18.7041	102.769		19.0488	123
	18.7042	106.172		19.0498	119
	18.7043	206.243		19.0508	136
	18.7044	79.6464		19.0518	144
	18.7045	86.3833		19.0528	145
	18.7046	169.787		19.0538	134
	18.7047	113.191		19.0548	125
	18.7048	133.261		19.0558	141
	18.7049	166.665		19.0568	136
	18.705	80.0682		19.0578	143
	18.7051	116.805		19.0588	134
	18.7052	46.8755		19.0598	127
	18.7053	43.6124		19.0608	137
	18.7054	170.349		19.0618	146
	18.7055	90.4197		19.0628	144
	18.7056	67.1567		19.0638	153
	18.7057	207.227		19.0648	173
	18.7058	140.631		19.0658	141
	18.7059	184.034		19.0668	153
	18.706	70.7712		19.0678	167
	18.7061	10.8415		19.0688	153
	18.7062	120.912		19.0698	152
	18.7063	114.315		19.0708	141
	18.7064	137.719		19.0718	165
	18.7066	127.86		19.0728	157
	18.7067	167.93		19.0738	149
	18.7068	151.334		19.0748	151
	18.7069	161.404		19.0758	156
	18.707	94.8077		19.0768	173
	18.7071	121.545		19.0778	150
	18.7072	181.615		19.0788	135
	18.7073	131.685		19.0798	169
	18.7074	65.0889		19.0808	167
	18.7075	75.1592		19.0818	158
	18.7076	108.563		19.0828	205
	18.7077	155.3		19.0838	179
	18.7078	175.37		19.0848	172
	18.7079	82.1071		19.0858	174
	18.708	108.844		19.0868	205
	18.7081	152.248		19.0878	172
	18.7082	195.651		19.0888	160
	18.7083	105.722		19.0898	181
	18.7084	195.792		19.0908	200
	18.7085	92.529		19.0918	174
	18.7086	59.266		19.0928	199
	18.7087	159.336		19.0938	210
	18.7088	166.073		19.0948	231
	18.7089	202.81		19.0958	230
	18.709	79.5473		19.0968	195
	18.7091	209.618		19.0978	189
	18.7092	256.355		19.0988	220
	18.7093	86.4249		19.0998	198
	18.7094	236.495		19.1008	182
	18.7095	113.232		19.1018	220
	18.7096	159.969		19.1028	196
	18.7097	160.04		19.1038	229
	18.7098	163.443		19.1048	210
	18.7099	200.18		19.1058	183
	18.71	156.917		19.1068	228
	18.7101	210.321		19.1078	231
	18.7102	240.391		19.1088	222
	18.7103	230.461		19.1098	257
	18.7104	163.865		19.1108	225
	18.7105	150.602		19.1118	235
	18.7106	97.3391		19.1128	210
	18.7107	154.076		19.1138	249
	18.7108	130.813		19.1148	247
	18.7109	230.883		19.1158	252
	18.711	157.62		19.1168	267
	18.7111	207.691		19.1178	263
	18.7112	104.428		19.1188	242
	18.7113	84.498		19.1198	266
	18.7114	87.9017		19.1208	261
	18.7115	251.305		19.1218	296
	18.7116	151.376		19.1228	283
	18.7117	68.1127		19.1238	287
	18.7118	141.516		19.1248	271
	18.7119	208.253		19.1258	277
	18.712	158.324		19.1268	291
	18.7121	131.727		19.1278	288
	18.7122	131.798		19.1288	264
	18.7123	135.201		19.1298	314
	18.7124	131.938		19.1308	304
	18.7125	162.009		19.1318	296
	18.7126	138.746		19.1328	323
	18.7127	135.483		19.1338	277
	18.7128	255.553		19.1348	303
	18.7129	255.623		19.1358	326
	18.713	185.694		19.1368	303
	18.7131	49.0973		19.1378	325
	18.7132	269.168		19.1388	314
	18.7133	129.238		19.1398	341
	18.7134	219.308		19.1408	328
	18.7135	199.379		19.1418	337
	18.7136	119.449		19.1428	346
	18.7137	166.186		19.1438	357
	18.7138	202.923		19.1448	350
	18.7139	209.66		19.1458	369
	18.714	239.73		19.1468	352
	18.7141	176.467		19.1478	401
	18.7142	183.204		19.1488	359
	18.7143	223.275		19.1498	386
	18.7144	286.678		19.1508	365
	18.7145	186.749		19.1518	397
	18.7146	223.486		19.1528	414
	18.7147	190.223		19.1538	372
	18.7148	223.626		19.1548	400
	18.7149	187.03		19.1558	379
	18.715	207.1		19.1568	410
	18.7151	153.837		19.1578	430
	18.7152	220.574		19.1588	411
	18.7153	80.6447		19.1598	424
	18.7154	180.715		19.1608	435
	18.7155	144.119		19.1618	404
	18.7156	117.522		19.1628	422
	18.7157	184.259		19.1638	510
	18.7158	214.33		19.1648	427
	18.7159	221.067		19.1658	437
	18.716	161.137		19.1668	472
	18.7161	261.207		19.1678	509
	18.7162	247.944		19.1688	485
	18.7163	231.348		19.1698	489
	18.7165	121.489		19.1708	513
	18.7166	241.559		19.1718	500
	18.7167	141.629		19.1728	544
	18.7168	168.366		19.1738	525
	18.7169	121.77		19.1748	576
	18.717	241.841		19.1758	515
	18.7171	265.244		19.1768	555
	18.7172	198.648		19.1778	538
	18.7173	178.718		19.1788	543
	18.7174	142.122		19.1798	560
	18.7175	148.859		19.1808	560
	18.7176	185.596		19.1818	601
	18.7177	232.333		19.1828	607
	18.7178	189.07		19.1838	568
	18.7179	142.474		19.1848	604
	18.718	162.544		19.1858	651
	18.7181	292.614		19.1868	666
	18.7182	136.018		19.1878	685
	18.7183	162.755		19.1888	687
	18.7184	219.492		19.1898	672
	18.7185	182.896		19.1908	678
	18.7186	222.966		19.1918	776
	18.7187	139.703		19.1928	698
	18.7188	173.107		19.1938	784
	18.7189	223.177		19.1948	745
	18.719	203.247		19.1958	742
	18.7191	223.318		19.1968	811
	18.7192	316.722		19.1978	815
	18.7193	216.792		19.1988	856
	18.7194	196.862		19.1998	886
	18.7195	280.266		19.2008	819
	18.7196	237.003		19.2018	861
	18.7197	147.073		19.2028	932
	18.7198	233.81		19.2038	968
	18.7199	207.214		19.2048	887
	18.72	197.284		19.2058	921
	18.7201	244.021		19.2068	976
	18.7202	174.092		19.2078	987
	18.7203	364.162		19.2088	1040
	18.7204	200.899		19.2098	980
	18.7205	240.969		19.2108	1066
	18.7206	294.373		19.2118	1152
	18.7207	124.444		19.2128	1117
	18.7208	261.181		19.2138	1178
	18.7209	257.918		19.2148	1212
	18.721	354.655		19.2158	1237
	18.7211	308.058		19.2168	1302
	18.7212	334.795		19.2178	1292
	18.7213	284.866		19.2188	1374
	18.7214	184.936		19.2198	1351
	18.7215	178.34		19.2208	1388
	18.7216	251.743		19.2218	1469
	18.7217	308.48		19.2228	1459
	18.7218	201.884		19.2238	1531
	18.7219	265.288		19.2248	1536
	18.722	338.692		19.2258	1611
	18.7221	142.095		19.2268	1683
	18.7222	245.499		19.2278	1800
	18.7223	215.569		19.2288	1794
	18.7224	238.973		19.2298	1955
	18.7225	165.71		19.2308	2001
	18.7226	125.78		19.2318	2051
	18.7227	215.851		19.2328	2191
	18.7228	229.254		19.2338	2277
	18.7229	325.992		19.2348	2328
	18.723	202.729		19.2358	2381
	18.7231	299.466		19.2368	2501
	18.7232	289.536		19.2378	2514
	18.7233	242.94		19.2388	2640
	18.7234	179.677		19.2398	2774
	18.7235	196.414		19.2408	2842
	18.7236	243.151		19.2418	3016
	18.7237	286.554		19.2428	3069
	18.7238	193.291		19.2438	3339
	18.7239	343.362		19.2448	3389
	18.724	270.099		19.2458	3547
	18.7241	263.503		19.2468	3859
	18.7242	223.573		19.2478	4007
	18.7243	173.643		19.2488	4218
	18.7244	273.714		19.2498	4395
	18.7245	263.784		19.2508	4692
	18.7246	223.854		19.2518	5125
	18.7247	337.258		19.2528	5210
	18.7248	233.995		19.2538	5758
	18.7249	224.066		19.2548	5986
	18.725	304.136		19.2558	6248
	18.7251	160.873		19.2568	6737
	18.7252	277.61		19.2578	7150
	18.7253	234.347		19.2588	7511
	18.7254	257.751		19.2598	8123
	18.7255	187.821		19.2608	8427
	18.7256	257.892		19.2618	8955
	18.7257	371.295		19.2628	9240
	18.7258	244.699		19.2638	9563
	18.726	228.173		19.2648	10092
	18.7261	268.243		19.2658	10766
	18.7262	314.98		19.2668	11342
	18.7263	255.051		19.2678	12049
	18.7264	365.121		19.2688	12666
	18.7265	295.192		19.2698	13096
	18.7266	231.929		19.2708	13744
	18.7267	258.666		19.2718	14176
	18.7268	305.403		19.2728	14261
	18.7269	398.806		19.2738	14356
	18.727	248.877		19.2748	14456
	18.7271	328.947		19.2758	14075
	18.7272	199.018		19.2768	13559
	18.7273	312.421		19.2778	12951
	18.7274	199.158		19.2788	12169
	18.7275	285.895		19.2798	11475
	18.7276	259.299		19.2808	10513
	18.7277	252.703		19.2818	10096
	18.7278	286.107		19.2828	9000
	18.7279	326.177		19.2838	8569
	18.728	262.914		19.2848	7792
	18.7281	266.318		19.2858	7311
	18.7282	366.388		19.2868	6748
	18.7283	336.458		19.2878	6149
	18.7284	296.529		19.2888	5674
	18.7285	309.933		19.2898	5092
	18.7286	216.67		19.2908	4827
	18.7287	283.407		19.2918	4254
	18.7288	283.477		19.2928	3943
	18.7289	306.881		19.2938	3638
	18.729	226.951		19.2948	3338
	18.7291	277.022		19.2958	3090
	18.7292	310.425		19.2968	2863
	18.7293	273.829		19.2978	2521
	18.7294	190.566		19.2988	2457
	18.7295	303.97		19.2998	2260
	18.7296	347.373		19.3008	2101
	18.7297	394.111		19.3018	1961
	18.7298	340.848		19.3028	1820
	18.7299	284.251		19.3038	1655
	18.73	330.988		19.3048	1581
	18.7301	331.059		19.3058	1498
	18.7302	321.129		19.3068	1353
	18.7303	371.2		19.3078	1265
	18.7304	281.27		19.3088	1218
	18.7305	321.34		19.3098	1055
	18.7306	358.077		19.3108	1044
	18.7307	248.148		19.3118	1029
	18.7308	371.551		19.3128	904
	18.7309	301.622		19.3138	921
	18.731	311.692		19.3148	817
	18.7311	255.096		19.3158	823
	18.7312	275.166		19.3168	757
	18.7313	295.237		19.3178	707
	18.7314	361.974		19.3188	691
	18.7315	325.378		19.3198	625
	18.7316	295.448		19.3208	623
	18.7317	365.518		19.3218	563
	18.7318	358.922		19.3228	563
	18.7319	385.659		19.3238	528
	18.732	302.396		19.3248	481
	18.7321	322.467		19.3258	488
	18.7322	292.537		19.3268	465
	18.7323	352.607		19.3278	454
	18.7324	319.344		19.3288	453
	18.7325	286.082		19.3298	400
	18.7326	279.485		19.3308	401
	18.7327	336.222		19.3318	327
	18.7328	232.959		19.3328	377
	18.7329	349.696		19.3338	342
	18.733	343.1		19.3348	367
	18.7331	233.171		19.3358	310
	18.7332	386.574		19.3368	309
	18.7333	299.978		19.3378	263
	18.7334	336.715		19.3388	287
	18.7335	353.452		19.3398	291
	18.7336	303.523		19.3408	258
	18.7337	343.593		19.3418	263
	18.7338	336.997		19.3428	254
	18.7339	333.734		19.3438	242
	18.734	367.138		19.3448	227
	18.7341	353.875		19.3458	213
	18.7342	327.278		19.3468	203
	18.7343	300.682		19.3478	210
	18.7344	367.419		19.3488	214
	18.7345	327.49		19.3498	216
	18.7346	287.56		19.3508	204
	18.7347	350.964		19.3518	162
	18.7348	394.367		19.3528	194
	18.7349	341.105		19.3538	187
	18.735	351.175		19.3548	168
	18.7351	261.245		19.3558	164
	18.7352	374.649		19.3568	156
	18.7353	341.386		19.3578	161
	18.7355	378.194		19.3588	149
	18.7356	258.264		19.3598	160
	18.7357	338.334		19.3608	136
	18.7358	348.405		19.3618	152
	18.7359	338.475		19.3628	125
	18.736	418.546		19.3638	133
	18.7361	388.616		19.3648	115
	18.7362	445.353		19.3658	128
	18.7363	392.09		19.3668	122
	18.7364	338.827		19.3678	117
	18.7365	438.898		19.3688	131
	18.7366	262.302		19.3698	117
	18.7367	319.039		19.3708	119
	18.7368	335.776		19.3718	107
	18.7369	252.513		19.3728	124
	18.737	435.916		19.3738	112
	18.7371	305.987		19.3748	105
	18.7372	416.057		19.3758	105
	18.7373	339.461		19.3768	108
	18.7374	252.865		19.3778	94
	18.7375	379.602		19.3788	100
	18.7376	379.672		19.3798	92
	18.7377	439.743		19.3808	95
	18.7378	209.813		19.3818	81
	18.7379	323.217		19.3828	79
	18.738	363.287		19.3838	87
	18.7381	413.358		19.3848	66
	18.7382	323.428		19.3858	96
	18.7383	346.832		19.3868	79
	18.7384	370.236		19.3878	81
	18.7385	440.306		19.3888	84
	18.7386	447.043		19.3898	84
	18.7387	423.78		19.3908	66
	18.7388	263.851		19.3918	74
	18.7389	353.921		19.3928	73
	18.739	343.992		19.3938	68
	18.7391	290.729		19.3948	68
	18.7392	357.466		19.3958	79
	18.7393	407.536		19.3968	61
	18.7394	394.273		19.3978	70
	18.7395	404.344		19.3988	60
	18.7396	321.081		19.3998	57
	18.7397	427.818		19.4008	73
	18.7398	414.555		19.4018	55
	18.7399	471.292		19.4028	59
	18.74	354.696		19.4038	64
	18.7401	308.099		19.4048	46
	18.7402	391.503		19.4058	70
	18.7403	418.24		19.4068	39
	18.7404	431.644		19.4078	52
	18.7405	458.381		19.4088	56
	18.7406	385.118		19.4098	52
	18.7407	345.189		19.4108	46
	18.7408	351.926		19.4118	59
	18.7409	505.33		19.4128	52
	18.741	482.067		19.4138	50
	18.7411	435.47		19.4148	55
	18.7412	432.208		19.4158	48
	18.7413	398.945		19.4168	49
	18.7414	422.348		19.4178	39
	18.7415	415.752		19.4188	62
	18.7416	319.156		19.4198	40
	18.7417	422.56		19.4208	42
	18.7418	379.297		19.4218	43
	18.7419	376.034		19.4228	46
	18.742	342.771		19.4238	41
	18.7421	379.508		19.4248	42
	18.7422	406.245		19.4258	45
	18.7423	519.649		19.4268	45
	18.7424	369.719		19.4278	40
	18.7425	389.79		19.4288	37
	18.7426	366.527		19.4298	40
	18.7427	443.264		19.4308	41
	18.7428	540.001		19.4318	46
	18.7429	400.072		19.4328	25
	18.743	416.809		19.4338	40
	18.7431	373.546		19.4348	32
	18.7432	386.949		19.4358	43
	18.7433	430.353		19.4368	39
	18.7434	387.09		19.4378	34
	18.7435	413.827		19.4388	27
	18.7436	377.231		19.4398	28
	18.7437	420.635		19.4408	38
	18.7438	377.372		19.4418	27
	18.7439	427.443		19.4428	38
	18.744	424.18		19.4438	40
	18.7441	437.583		19.4448	33
	18.7442	397.654		19.4458	38
	18.7443	417.724		19.4468	37
	18.7444	327.795		19.4478	22
	18.7445	377.865		19.4488	37
	18.7446	421.269		19.4498	24
	18.7447	358.006		19.4508	28
	18.7448	418.077		19.4518	34
	18.745	368.217		19.4528	28
	18.7451	421.621		19.4538	22
	18.7452	438.358		19.4548	25
	18.7453	448.429		19.4558	33
	18.7454	491.832		19.4568	26
	18.7455	421.903		19.4578	20
	18.7456	425.307		19.4588	22
	18.7457	402.044		19.4598	25
	18.7458	445.448		19.4608	32
	18.7459	442.185		19.4618	23
	18.746	422.255		19.4628	29
	18.7461	422.326		19.4638	21
	18.7462	475.729		19.4648	30
	18.7463	415.8		19.4658	27
	18.7464	435.87		19.4668	22
	18.7465	502.607		19.4678	25
	18.7466	456.011		19.4688	24
	18.7467	392.748		19.4698	31
	18.7468	449.485		19.4708	23
	18.7469	429.556		19.4718	28
	18.747	392.96		19.4728	21
	18.7471	346.363		19.4738	24
	18.7472	443.101		19.4748	22
	18.7473	509.838		19.4758	20
	18.7474	479.908		19.4768	23
	18.7475	329.979		19.4778	27
	18.7476	543.382		19.4788	22
	18.7477	456.786		19.4798	26
	18.7478	446.857		19.4808	17
	18.7479	433.594		19.4818	26
	18.748	486.997		19.4828	24
	18.7481	450.401		19.4838	25
	18.7482	433.805		19.4848	29
	18.7483	493.875		19.4858	23
	18.7484	460.613		19.4868	18
	18.7485	544.016		19.4878	13
	18.7486	500.754		19.4888	18
	18.7487	434.157		19.4898	20
	18.7488	497.561		19.4908	11
	18.7489	500.965		19.4918	14
	18.749	527.702		19.4928	17
	18.7491	481.106		19.4938	17
	18.7492	491.176		19.4948	23
	18.7493	514.58		19.4958	11
	18.7494	441.317		19.4968	13
	18.7495	431.388		19.4978	13
	18.7496	398.125		19.4988	29
	18.7497	514.862		19.4998	14
	18.7498	381.599		19.5008	11
	18.7499	425.003		19.5018	14
	18.75	471.74		19.5028	29
	18.7501	598.477		19.5038	19
	18.7502	558.547		19.5048	17
	18.7503	535.285		19.5058	14
	18.7504	445.355		19.5068	16
	18.7505	485.426		19.5078	14
	18.7506	415.496		19.5088	11
	18.7507	465.566		19.5098	11
	18.7508	518.97		19.5108	19
	18.7509	489.041		19.5118	26
	18.751	502.444		19.5128	14
	18.7511	549.182		19.5138	23
	18.7512	475.919		19.5148	13
	18.7513	442.656		19.5158	13
	18.7514	516.06		19.5168	17
	18.7515	486.13		19.5178	19
	18.7516	429.534		19.5188	16
	18.7517	502.938		19.5198	17
	18.7518	529.675		19.5208	14
	18.7519	483.079		19.5218	14
	18.752	446.482		19.5228	14
	18.7521	486.553		19.5238	15
	18.7522	503.29		19.5248	12
	18.7523	376.694		19.5258	20
	18.7524	580.098		19.5268	17
	18.7525	590.168		19.5278	12
	18.7526	646.905		19.5288	12
	18.7527	440.309		19.5298	22
	18.7528	540.38		19.5308	15
	18.7529	523.783		19.5318	16
	18.753	490.52		19.5328	17
	18.7531	550.591		19.5338	10
	18.7532	540.661		19.5348	17
	18.7533	524.065		19.5358	13
	18.7534	547.469		19.5368	11
	18.7535	540.873		19.5378	9
	18.7536	527.61		19.5388	24
	18.7537	554.347		19.5398	10
	18.7538	534.418		19.5408	7
	18.7539	557.821		19.5418	19
	18.754	474.559		19.5428	10
	18.7541	451.296		19.5438	18
	18.7542	601.366		19.5448	6
	18.7543	648.103		19.5458	3
	18.7545	458.244		19.5468	9
	18.7546	444.981		19.5478	11
	18.7547	528.385		19.5488	10
	18.7548	605.122		19.5498	14
	18.7549	595.193		19.5508	14
	18.755	521.93		19.5518	21
	18.7551	448.667		19.5528	13
	18.7552	502.071		19.5538	11
	18.7553	655.475		19.5548	11
	18.7554	552.212		19.5558	9
	18.7555	618.949		19.5568	13
	18.7556	529.019		19.5578	11
	18.7557	439.09		19.5588	16
	18.7558	472.494		19.5598	7
	18.7559	429.231		19.5608	14
	18.756	529.301		19.5618	6
	18.7561	452.705		19.5628	18
	18.7562	539.442		19.5638	5
	18.7563	519.513		19.5648	13
	18.7564	546.25		19.5658	10
	18.7565	586.32		19.5668	15
	18.7566	576.391		19.5678	14
	18.7567	569.795		19.5688	8
	18.7568	643.199		19.5698	15
	18.7569	539.936		19.5708	11
	18.757	550.006		19.5718	8
	18.7571	510.077		19.5728	11
	18.7572	493.48		19.5738	7
	18.7573	550.218		19.5748	6
	18.7574	696.955		19.5758	12
	18.7575	583.692		19.5768	10
	18.7576	553.762		19.5778	12
	18.7577	523.833		19.5788	11
	18.7578	510.57
	18.7579	653.974
	18.758	634.044
	18.7581	604.115
	18.7582	624.185
	18.7583	560.922
	18.7584	660.993
	18.7585	551.063
	18.7586	627.801
	18.7587	631.204
	18.7588	557.942
	18.7589	621.345
	18.759	744.749
	18.7591	554.82
	18.7592	501.557
	18.7593	631.627
	18.7594	708.365
	18.7595	565.102
	18.7596	591.839
	18.7597	555.243
	18.7598	558.646
	18.7599	575.384
	18.76	558.787
	18.7601	562.191
	18.7602	555.595
	18.7603	578.999
	18.7604	609.069
	18.7605	742.473
	18.7606	692.544
	18.7607	645.948
	18.7608	582.685
	18.7609	562.755
	18.761	596.159
	18.7611	602.896
	18.7612	669.633
	18.7613	749.704
	18.7614	476.441
	18.7615	609.845
	18.7616	666.582
	18.7617	656.653
	18.7618	560.056
	18.7619	726.794
	18.762	566.864
	18.7621	603.601
	18.7622	717.005
	18.7623	717.076
	18.7624	653.813
	18.7625	707.217
	18.7626	600.62
	18.7627	547.358
	18.7628	527.428
	18.7629	740.832
	18.763	734.236
	18.7631	680.973
	18.7632	634.377
	18.7633	567.781
	18.7634	541.184
	18.7635	697.922
	18.7636	657.992
	18.7637	514.729
	18.7638	764.8
	18.764	618.274
	18.7641	665.011
	18.7642	671.748
	18.7643	708.486
	18.7644	575.223
	18.7645	688.627
	18.7646	605.364
	18.7647	662.101
	18.7648	752.172
	18.7649	642.242
	18.765	665.646
	18.7651	622.383
	18.7652	565.787
	18.7653	649.191
	18.7654	685.928
	18.7655	722.665
	18.7656	669.402
	18.7657	629.473
	18.7658	632.877
	18.7659	729.614
	18.766	753.018
	18.7661	729.755
	18.7662	769.825
	18.7663	716.563
	18.7664	646.633
	18.7665	570.037
	18.7666	656.774
	18.7667	700.178
	18.7668	693.582
	18.7669	706.986
	18.767	643.723
	18.7671	693.793
	18.7672	730.531
	18.7673	663.934
	18.7674	724.005
	18.7675	687.409
	18.7676	720.813
	18.7677	707.55
	18.7678	710.954
	18.7679	714.357
	18.768	674.428
	18.7681	697.832
	18.7682	724.569
	18.7683	681.306
	18.7684	674.71
	18.7685	731.447
	18.7686	854.851
	18.7687	804.922
	18.7688	748.325
	18.7689	768.396
	18.769	725.133
	18.7691	831.87
	18.7692	691.941
	18.7693	812.011
	18.7694	788.749
	18.7695	705.486
	18.7696	695.556
	18.7697	815.627
	18.7698	762.364
	18.7699	739.101
	18.77	669.172
	18.7701	615.909
	18.7702	642.646
	18.7703	859.383
	18.7704	772.787
	18.7705	716.191
	18.7706	882.928
	18.7707	772.999
	18.7708	763.069
	18.7709	779.807
	18.771	596.544
	18.7711	669.948
	18.7712	903.351
	18.7713	610.089
	18.7714	740.159
	18.7715	740.23
	18.7716	746.967
	18.7717	737.037
	18.7718	780.441
	18.7719	750.512
	18.772	767.249
	18.7721	790.653
	18.7722	664.057
	18.7723	804.127
	18.7724	887.531
	18.7725	780.935
	18.7726	844.339
	18.7727	997.743
	18.7728	861.147
	18.7729	761.217
	18.773	744.621
	18.7731	688.025
	18.7732	658.096
	18.7733	778.166
	18.7735	794.974
	18.7736	828.378
	18.7737	831.782
	18.7738	741.852
	18.7739	761.923
	18.774	851.993
	18.7741	862.064
	18.7742	765.468
	18.7743	692.205
	18.7744	808.942
	18.7745	809.013
	18.7746	882.416
	18.7747	839.154
	18.7748	959.224
	18.7749	772.628
	18.775	886.032
	18.7751	812.769
	18.7752	826.173
	18.7753	819.577
	18.7754	842.981
	18.7755	869.718
	18.7756	713.122
	18.7757	843.192
	18.7758	916.596
	18.7759	790
	18.776	833.404
	18.7761	856.808
	18.7762	866.878
	18.7763	836.949
	18.7764	857.02
	18.7765	800.423
	18.7766	870.494
	18.7767	850.565
	18.7768	910.635
	18.7769	854.039
	18.777	804.11
	18.7771	877.513
	18.7772	847.584
	18.7773	847.655
	18.7774	797.725
	18.7775	914.462
	18.7776	994.533
	18.7777	911.27
	18.7778	911.341
	18.7779	848.078
	18.778	834.815
	18.7781	874.886
	18.7782	1021.62
	18.7783	898.36
	18.7784	855.097
	18.7785	1091.83
	18.7786	948.572
	18.7787	895.309
	18.7788	952.046
	18.7789	985.45
	18.779	1045.52
	18.7791	732.258
	18.7792	858.995
	18.7793	1059.07
	18.7794	879.136
	18.7795	955.873
	18.7796	999.277
	18.7797	886.015
	18.7798	946.085
	18.7799	996.156
	18.78	949.56
	18.7801	836.297
	18.7802	956.367
	18.7803	1049.77
	18.7804	983.175
	18.7805	883.246
	18.7806	1069.98
	18.7807	946.72
	18.7808	920.124
	18.7809	910.195
	18.781	933.599
	18.7811	987.002
	18.7812	840.406
	18.7813	860.477
	18.7814	973.881
	18.7815	1140.62
	18.7816	884.022
	18.7817	900.759
	18.7818	944.163
	18.7819	924.234
	18.782	924.304
	18.7821	984.375
	18.7822	1091.11
	18.7823	894.516
	18.7824	1031.25
	18.7825	1014.66
	18.7826	998.061
	18.7827	954.798
	18.7828	1038.2
	18.783	928.343
	18.7831	1028.41
	18.7832	995.151
	18.7833	948.555
	18.7834	1048.63
	18.7835	1052.03
	18.7836	1002.1
	18.7837	958.837
	18.7838	1152.24
	18.7839	1045.65
	18.784	1002.38
	18.7841	929.12
	18.7842	1152.52
	18.7843	1062.59
	18.7844	982.665
	18.7845	1022.74
	18.7846	1022.81
	18.7847	1046.21
	18.7848	1076.28
	18.7849	959.684
	18.785	1059.75
	18.7851	1103.16
	18.7852	1023.23
	18.7853	899.966
	18.7854	1016.7
	18.7855	1063.44
	18.7856	1103.51
	18.7857	1076.92
	18.7858	1113.65
	18.7859	1010.39
	18.786	1193.79
	18.7861	977.198
	18.7862	1010.6
	18.7863	1177.34
	18.7864	1087.41
	18.7865	1150.81
	18.7866	1117.55
	18.7867	1264.29
	18.7868	1187.69
	18.7869	1037.76
	18.787	974.5
	18.7871	1027.9
	18.7872	1101.31
	18.7873	1028.04
	18.7874	1024.78
	18.7875	1044.85
	18.7876	1051.59
	18.7877	1134.99
	18.7878	1015.06
	18.7879	1235.13
	18.788	1108.54
	18.7881	1098.61
	18.7882	1145.35
	18.7883	1238.75
	18.7884	1182.15
	18.7885	1105.56
	18.7886	1242.3
	18.7887	1265.7
	18.7888	1112.44
	18.7889	1109.17
	18.789	1055.91
	18.7891	1112.65
	18.7892	1019.39
	18.7893	952.79
	18.7894	1242.86
	18.7895	1099.6
	18.7896	1176.34
	18.7897	1183.07
	18.7898	1119.81
	18.7899	1049.88
	18.79	1276.62
	18.7901	1186.69
	18.7902	1003.43
	18.7903	1243.5
	18.7904	1156.9
	18.7905	1056.97
	18.7906	1127.04
	18.7907	1203.78
	18.7908	1037.18
	18.7909	1267.25
	18.791	1117.32
	18.7911	1127.39
	18.7912	1207.46
	18.7913	1327.54
	18.7914	1194.27
	18.7915	1251.01
	18.7916	1121.08
	18.7917	1207.82
	18.7918	1091.22
	18.7919	1277.96
	18.792	1188.03
	18.7921	1131.43
	18.7922	1284.84
	18.7923	1248.24
	18.7925	1255.05
	18.7926	1138.45
	18.7927	1051.86
	18.7928	1321.93
	18.7929	1135.33
	18.793	1185.4
	18.7931	1248.81
	18.7932	1188.88
	18.7933	1282.28
	18.7934	1235.68
	18.7935	1192.42
	18.7936	1312.49
	18.7937	1215.9
	18.7938	1129.3
	18.7939	1192.7
	18.794	1209.44
	18.7941	1319.51
	18.7942	1262.92
	18.7943	1336.32
	18.7944	1296.39
	18.7945	1306.46
	18.7946	1159.87
	18.7947	1323.27
	18.7948	1313.34
	18.7949	1250.08
	18.795	1376.81
	18.7951	1396.88
	18.7952	1180.29
	18.7953	1203.69
	18.7954	1187.1
	18.7955	1137.17
	18.7956	1360.57
	18.7957	1350.64
	18.7958	1150.71
	18.7959	1407.45
	18.796	1217.52
	18.7961	1360.92
	18.7962	1287.66
	18.7963	1377.73
	18.7964	1294.47
	18.7965	1207.87
	18.7966	1277.94
	18.7967	1281.35
	18.7968	1404.75
	18.7969	1274.82
	18.797	1321.56
	18.7971	1284.96
	18.7972	1375.03
	18.7973	1378.44
	18.7974	1255.18
	18.7975	1305.25
	18.7976	1248.65
	18.7977	1398.72
	18.7978	1418.79
	18.7979	1368.86
	18.798	1462.27
	18.7981	1385.67
	18.7982	1312.41
	18.7983	1392.48
	18.7984	1312.55
	18.7985	1355.95
	18.7986	1366.02
	18.7987	1419.43
	18.7988	1236.16
	18.7989	1299.57
	18.799	1429.64
	18.7991	1493.04
	18.7992	1569.78
	18.7993	1486.52
	18.7994	1489.92
	18.7995	1373.33
	18.7996	1486.73
	18.7997	1463.47
	18.7998	1596.87
	18.7999	1460.27
	18.8	1413.68
	18.8001	1310.42
	18.8002	1480.49
	18.8003	1520.56
	18.8004	1580.63
	18.8005	1360.7
	18.8006	1407.44
	18.8007	1574.17
	18.8008	1577.58
	18.8009	1437.65
	18.801	1531.05
	18.8011	1491.12
	18.8012	1374.53
	18.8013	1457.93
	18.8014	1491.33
	18.8015	1584.74
	18.8016	1608.14
	18.8017	1608.21
	18.8018	1491.62
	18.802	1448.42
	18.8021	1601.83
	18.8022	1585.23
	18.8023	1608.64
	18.8024	1538.71
	18.8025	1588.78
	18.8026	1522.18
	18.8027	1645.59
	18.8028	1418.99
	18.8029	1485.73
	18.803	1479.13
	18.8031	1512.54
	18.8032	1402.61
	18.8033	1706.01
	18.8034	1652.75
	18.8035	1549.48
	18.8036	1462.89
	18.8037	1716.29
	18.8038	1483.03
	18.8039	1443.1
	18.804	1566.5
	18.8041	1746.57
	18.8042	1626.65
	18.8043	1543.38
	18.8044	1563.45
	18.8045	1506.86
	18.8046	1640.26
	18.8047	1567
	18.8048	1630.4
	18.8049	1750.47
	18.805	1687.21
	18.8051	1727.28
	18.8052	1757.35
	18.8053	1690.76
	18.8054	1497.49
	18.8055	1640.9
	18.8056	1680.97
	18.8057	1697.71
	18.8058	1647.78
	18.8059	1567.85
	18.806	1644.58
	18.8061	1674.65
	18.8062	1748.06
	18.8063	1741.46
	18.8064	1701.53
	18.8065	1884.94
	18.8066	1695.01
	18.8067	1715.08
	18.8068	1601.82
	18.8069	1898.55
	18.807	1691.96
	18.8071	1645.36
	18.8072	1882.1
	18.8073	1792.17
	18.8074	1755.57
	18.8075	1638.98
	18.8076	1702.38
	18.8077	1799.12
	18.8078	1812.52
	18.8079	1709.26
	18.808	1802.66
	18.8081	1889.4
	18.8082	1799.47
	18.8083	1769.54
	18.8084	1879.61
	18.8085	1796.35
	18.8086	1829.75
	18.8087	1803.16
	18.8088	1773.23
	18.8089	1913.3
	18.809	1933.37
	18.8091	1836.77
	18.8092	1810.18
	18.8093	1903.58
	18.8094	1853.65
	18.8095	1930.39
	18.8096	1907.13
	18.8097	1880.53
	18.8098	1813.94
	18.8099	1874.01
	18.81	2060.74
	18.8101	2050.81
	18.8102	2044.22
	18.8103	1780.96
	18.8104	1771.03
	18.8105	1944.43
	18.8106	1864.5
	18.8107	1851.24
	18.8108	2124.64
	18.8109	1861.38
	18.811	1881.45
	18.8111	2001.52
	18.8112	2064.92
	18.8113	2031.66
	18.8114	1968.4
	18.8115	2005.14
	18.8116	1855.21
	18.8117	2018.61
	18.8118	1912.02
	18.8119	1925.42
	18.812	1972.16
	18.8121	1962.23
	18.8122	2032.3
	18.8123	1945.7
	18.8124	2102.44
	18.8125	2132.51
	18.8126	2065.91
	18.8127	2075.98
	18.8128	1939.39
	18.8129	2002.79
	18.813	2056.2
	18.8131	2062.93
	18.8132	2139.67
	18.8133	1843.08
	18.8134	1969.81
	18.8135	2013.22
	18.8136	2066.62
	18.8137	2110.02
	18.8138	2223.43
	18.8139	2196.83
	18.814	2023.57
	18.8141	2140.31
	18.8142	1967.04
	18.8143	2137.12
	18.8144	1977.19
	18.8145	2050.59
	18.8146	2123.99
	18.8147	2134.06
	18.8148	2180.8
	18.8149	2204.21
	18.815	2134.28
	18.8151	2087.68
	18.8152	2157.75
	18.8153	2277.82
	18.8154	2051.23
	18.8155	2104.63
	18.8156	2291.37
	18.8157	2134.77
	18.8158	2261.51
	18.8159	2151.58
	18.816	2194.98
	18.8161	1965.05
	18.8162	2075.13
	18.8163	2185.2
	18.8164	2215.27
	18.8165	2208.67
	18.8166	2268.74
	18.8167	2248.81
	18.8168	2205.55
	18.8169	2452.29
	18.817	2279.02
	18.8171	2342.43
	18.8172	2272.5
	18.8173	2142.57
	18.8174	2369.31
	18.8175	2302.71
	18.8176	2269.45
	18.8177	2186.19
	18.8178	2322.92
	18.8179	2339.66
	18.818	2366.4
	18.8181	2349.8
	18.8182	2343.21
	18.8183	2529.94
	18.8184	2320.01
	18.8185	2266.75
	18.8186	2383.49
	18.8187	2416.89
	18.8188	2413.63
	18.8189	2413.7
	18.819	2403.77
	18.8191	2413.84
	18.8192	2377.25
	18.8193	2187.32
	18.8194	2430.72
	18.8195	2490.79
	18.8196	2404.2
	18.8197	2440.93
	18.8198	2454.34
	18.8199	2451.07
	18.82	2277.81
	18.8201	2511.22
	18.8202	2694.62
	18.8203	2498.02
	18.8204	2671.43
	18.8205	2504.83
	18.8206	2431.57
	18.8207	2651.64
	18.8208	2575.04
	18.8209	2598.45
	18.821	2605.19
	18.8211	2505.26
	18.8212	2505.33
	18.8214	2778.8
	18.8215	2592.21
	18.8216	2602.28
	18.8217	2545.68
	18.8218	2585.75
	18.8219	2585.82
	18.822	2822.56
	18.8221	2622.63
	18.8222	2609.37
	18.8223	2662.77
	18.8224	2826.17
	18.8225	2529.58
	18.8226	2749.65
	18.8227	2689.72
	18.8228	2759.79
	18.8229	2806.53
	18.823	2606.6
	18.8231	2613.34
	18.8232	2630.07
	18.8233	2686.81
	18.8234	2806.88
	18.8235	2626.95
	18.8236	2600.36
	18.8237	2797.09
	18.8238	2737.16
	18.8239	2773.9
	18.824	2850.64
	18.8241	2740.71
	18.8242	2654.11
	18.8243	2844.19
	18.8244	2724.26
	18.8245	2977.66
	18.8246	2851.06
	18.8247	2787.8
	18.8248	2887.87
	18.8249	2747.94
	18.825	2801.35
	18.8251	3108.08
	18.8252	2891.49
	18.8253	2948.23
	18.8254	3044.96
	18.8255	3135.03
	18.8256	2885.1
	18.8257	2765.18
	18.8258	3065.25
	18.8259	2951.98
	18.826	2998.72
	18.8261	2905.46
	18.8262	3128.86
	18.8263	2945.6
	18.8264	3022.34
	18.8265	3039.07
	18.8266	3135.81
	18.8267	2952.55
	18.8268	3015.95
	18.8269	2859.36
	18.827	3196.09
	18.8271	2876.17
	18.8272	3136.24
	18.8273	3112.97
	18.8274	3049.71
	18.8275	3149.78
	18.8276	2996.52
	18.8277	3246.59
	18.8278	3233.33
	18.8279	3026.73
	18.828	3083.47
	18.8281	3110.21
	18.8282	3196.94
	18.8283	3210.35
	18.8284	2973.75
	18.8285	3140.49
	18.8286	3267.23
	18.8287	3233.96
	18.8288	3177.37
	18.8289	3267.44
	18.829	3394.18
	18.8291	3154.25
	18.8292	3184.32
	18.8293	3347.72
	18.8294	3197.79
	18.8295	3081.2
	18.8296	3257.93
	18.8297	3091.34
	18.8298	3338.07
	18.8299	3251.48
	18.83	3518.22
	18.8301	3191.62
	18.8302	3198.36
	18.8303	3205.1
	18.8304	3315.17
	18.8305	3448.57
	18.8306	3321.97
	18.8307	3572.04
	18.8309	3355.52
	18.831	3318.92
	18.8311	3662.33
	18.8312	3409.07
	18.8313	3162.47
	18.8314	3355.87
	18.8315	3405.94
	18.8316	3586.01
	18.8317	3472.75
	18.8318	3362.82
	18.8319	3549.56
	18.832	3409.63
	18.8321	3569.7
	18.8322	3286.44
	18.8323	3589.84
	18.8324	3356.58
	18.8325	3709.98
	18.8326	3356.72
	18.8327	3560.13
	18.8328	3533.53
	18.8329	3740.27
	18.833	3677.01
	18.8331	3733.74
	18.8332	3623.81
	18.8333	3677.22
	18.8334	3580.62
	18.8335	3474.03
	18.8336	3574.1
	18.8337	3707.5
	18.8338	3737.57
	18.8339	3514.31
	18.834	3804.38
	18.8341	3764.45
	18.8342	3707.85
	18.8343	3797.92
	18.8344	3558
	18.8345	3648.07
	18.8346	3894.8
	18.8347	3608.21
	18.8348	3778.28
	18.8349	3595.02
	18.835	3661.75
	18.8351	3735.16
	18.8352	3831.89
	18.8353	3908.63
	18.8354	3828.7
	18.8355	3785.44
	18.8356	3772.18
	18.8357	3915.58
	18.8358	3882.32
	18.8359	3909.06
	18.836	3775.79
	18.8361	3932.53
	18.8362	3705.94
	18.8363	3942.67
	18.8364	3862.74
	18.8365	3796.15
	18.8366	3962.89
	18.8367	3672.96
	18.8368	3896.36
	18.8369	3989.76
	18.837	3843.17
	18.8371	4209.91
	18.8372	4069.98
	18.8373	4156.71
	18.8374	4126.78
	18.8375	4306.86
	18.8376	4053.59
	18.8377	4103.66
	18.8378	4067.07
	18.8379	3953.81
	18.838	3903.88
	18.8381	4067.28
	18.8382	4174.02
	18.8383	4164.09
	18.8384	4220.83
	18.8385	4137.56
	18.8386	4160.97
	18.8387	4241.04
	18.8388	4284.44
	18.8389	4184.51
	18.839	4007.92
	18.8391	4164.65
	18.8392	4304.73
	18.8393	4244.8
	18.8394	4298.2
	18.8395	4338.27
	18.8396	4041.67
	18.8397	4511.75
	18.8398	4321.82
	18.8399	4471.89
	18.84	4345.29
	18.8401	4578.7
	18.8402	4228.77
	18.8404	4352.24
	18.8405	4502.31
	18.8406	4235.72
	18.8407	4705.79
	18.8408	4692.52
	18.8409	4505.93
	18.841	4509.33
	18.8411	4406.07
	18.8412	4682.81
	18.8413	4446.21
	18.8414	4499.62
	18.8415	4456.35
	18.8416	4616.42
	18.8417	4483.16
	18.8418	4676.57
	18.8419	4713.3
	18.842	4650.04
	18.8421	4630.11
	18.8422	4666.85
	18.8423	4473.59
	18.8424	4656.99
	18.8425	4737.06
	18.8426	4403.8
	18.8427	4930.54
	18.8428	4777.27
	18.8429	4960.68
	18.843	4680.75
	18.8431	4757.49
	18.8432	4884.22
	18.8433	4887.63
	18.8434	4707.7
	18.8435	4817.77
	18.8436	4801.17
	18.8437	5037.91
	18.8438	5104.65
	18.8439	4908.05
	18.844	4731.46
	18.8441	5154.86
	18.8442	4904.93
	18.8443	4931.67
	18.8444	4915.07
	18.8445	4941.81
	18.8446	5211.88
	18.8447	5235.28
	18.8448	4995.36
	18.8449	5028.76
	18.845	5068.83
	18.8451	5045.57
	18.8452	5142.3
	18.8453	5335.71
	18.8454	5155.78
	18.8455	5239.18
	18.8456	5242.59
	18.8457	5119.33
	18.8458	5072.73
	18.8459	5262.8
	18.846	5146.2
	18.8461	5426.28
	18.8462	5029.68
	18.8463	5466.42
	18.8464	5276.49
	18.8465	5306.56
	18.8466	5399.96
	18.8467	5143.37
	18.8468	5383.44
	18.8469	5426.84
	18.847	5526.91
	18.8471	5426.98
	18.8472	5333.72
	18.8473	5567.12
	18.8474	5450.53
	18.8475	5550.6
	18.8476	5594
	18.8477	5527.41
	18.8478	5387.48
	18.8479	5567.55
	18.848	5467.62
	18.8481	5897.69
	18.8482	5597.76
	18.8483	5907.83
	18.8484	5691.24
	18.8485	5857.97
	18.8486	5651.38
	18.8487	5991.45
	18.8488	5771.52
	18.8489	5821.59
	18.849	5724.99
	18.8491	5675.07
	18.8492	5738.47
	18.8493	5978.54
	18.8494	5841.94
	18.8495	6092.02
	18.8496	5725.42
	18.8497	6092.16
	18.8499	5915.63
	18.85	6085.7
	18.8501	5869.11
	18.8502	6062.51
	18.8503	6089.25
	18.8504	6025.99
	18.8505	6219.39
	18.8506	5982.79
	18.8507	5919.53
	18.8508	6132.94
	18.8509	6053.01
	18.851	6143.08
	18.8511	6203.15
	18.8512	6069.89
	18.8513	6499.96
	18.8514	6316.69
	18.8515	6336.76
	18.8516	6200.17
	18.8517	6226.91
	18.8518	6420.31
	18.8519	6470.38
	18.852	6020.45
	18.8521	6233.86
	18.8522	6323.93
	18.8523	6584
	18.8524	6510.74
	18.8525	6387.47
	18.8526	6650.88
	18.8527	6537.61
	18.8528	6761.02
	18.8529	6731.09
	18.853	6577.83
	18.8531	6611.23
	18.8532	6664.64
	18.8533	6604.71
	18.8534	6694.78
	18.8535	6608.18
	18.8536	6544.92
	18.8537	6691.66
	18.8538	6808.39
	18.8539	6841.8
	18.854	6751.87
	18.8541	6555.27
	18.8542	6672.01
	18.8543	6918.75
	18.8544	6935.49
	18.8545	6602.22
	18.8546	6978.96
	18.8547	6725.7
	18.8548	6672.44
	18.8549	6649.17
	18.855	6829.24
	18.8551	7175.98
	18.8552	7149.38
	18.8553	6979.46
	18.8554	7029.53
	18.8555	7372.93
	18.8556	7269.67
	18.8557	7083.07
	18.8558	7253.14
	18.8559	7123.21
	18.856	7326.62
	18.8561	7323.36
	18.8562	7136.76
	18.8563	7260.16
	18.8564	7450.23
	18.8565	7476.97
	18.8566	7307.04
	18.8567	7627.11
	18.8568	7303.85
	18.8569	7477.26
	18.857	7203.99
	18.8571	7297.4
	18.8572	7480.8
	18.8573	7374.21
	18.8574	7457.61
	18.8575	7707.68
	18.8576	7571.08
	18.8577	7764.49
	18.8578	7284.56
	18.8579	7847.96
	18.858	7631.37
	18.8581	7884.77
	18.8582	8058.18
	18.8583	7618.25
	18.8584	7864.98
	18.8585	7851.72
	18.8586	7965.13
	18.8587	7965.2
	18.8588	8105.27
	18.8589	7935.34
	18.859	8298.74
	18.8591	8175.48
	18.8592	8488.88
	18.8594	8139.03
	18.8595	8289.1
	18.8596	8439.17
	18.8597	8145.91
	18.8598	8392.64
	18.8599	8422.71
	18.86	8762.78
	18.8601	8762.86
	18.8602	8702.93
	18.8603	8146.33
	18.8604	8509.73
	18.8605	8663.14
	18.8606	8719.88
	18.8607	8539.95
	18.8608	8623.35
	18.8609	8636.76
	18.861	8850.16
	18.8611	8780.23
	18.8612	8816.97
	18.8613	9283.71
	18.8614	8803.78
	18.8615	8593.85
	18.8616	8803.92
	18.8617	9170.66
	18.8618	9014.06
	18.8619	8697.46
	18.862	9310.87
	18.8621	9364.27
	18.8622	9251.01
	18.8623	9337.75
	18.8624	9067.82
	18.8625	9317.89
	18.8626	9204.63
	18.8627	9178.03
	18.8628	9624.77
	18.8629	9278.17
	18.863	9331.58
	18.8631	10111.6
	18.8632	9928.38
	18.8633	9961.79
	18.8634	9941.86
	18.8635	9538.6
	18.8636	9805.33
	18.8637	9782.07
	18.8638	9982.14
	18.8639	9938.88
	18.864	10162.3
	18.8641	9959.02
	18.8642	10025.8
	18.8643	10222.5
	18.8644	10259.2
	18.8645	10146
	18.8646	10212.7
	18.8647	10502.8
	18.8648	10419.5
	18.8649	10486.3
	18.865	10413
	18.8651	10266.4
	18.8652	10773.1
	18.8653	10899.9
	18.8654	10609.9
	18.8655	10943.3
	18.8656	10883.4
	18.8657	10986.8
	18.8658	10853.6
	18.8659	11320.3
	18.866	11417
	18.8661	11317.1
	18.8662	11413.8
	18.8663	11527.2
	18.8664	11357.3
	18.8665	11564.1
	18.8666	11850.8
	18.8667	11434.2
	18.8668	11687.6
	18.8669	11761
	18.867	11941.1
	18.8671	11881.1
	18.8672	11854.6
	18.8673	12034.6
	18.8674	12461.4
	18.8675	11781.4
	18.8676	12121.5
	18.8677	12608.2
	18.8678	12441.6
	18.8679	12731.7
	18.868	12451.8
	18.8681	13045.2
	18.8682	12405.3
	18.8683	12628.7
	18.8684	12635.4
	18.8685	12408.8
	18.8686	12625.5
	18.8687	13248.9
	18.8689	12972.4
	18.869	13019.2
	18.8691	13269.2
	18.8692	13522.6
	18.8693	13309.4
	18.8694	13969.4
	18.8695	13676.2
	18.8696	13836.3
	18.8697	13996.3
	18.8698	14229.7
	18.8699	14529.8
	18.87	14173.2
	18.8701	14673.3
	18.8702	14350
	18.8703	14366.7
	18.8704	14293.5
	18.8705	14263.6
	18.8706	14960.3
	18.8707	15133.7
	18.8708	15107.1
	18.8709	14593.8
	18.871	14760.6
	18.8711	15207.3
	18.8712	15480.7
	18.8713	15314.1
	18.8714	15314.2
	18.8715	15484.3
	18.8716	15561
	18.8717	16244.4
	18.8718	15581.1
	18.8719	15857.9
	18.872	15964.6
	18.8721	15968
	18.8722	16481.4
	18.8723	16268.2
	18.8724	16474.9
	18.8725	16001.6
	18.8726	16601.7
	18.8727	16301.8
	18.8728	16971.9
	18.8729	17348.6
	18.873	17348.7
	18.8731	17342.1
	18.8732	17855.5
	18.8733	17285.5
	18.8734	17625.6
	18.8735	17469
	18.8736	17259.1
	18.8737	17965.8
	18.8738	18062.6
	18.8739	17456
	18.874	18319.4
	18.8741	18626.1
	18.8742	18706.2
	18.8743	18172.9
	18.8744	18556.3
	18.8745	18799.7
	18.8746	19006.5
	18.8747	18823.2
	18.8748	18486.6
	18.8749	19166.7
	18.875	19490.1
	18.8751	19673.5
	18.8752	19323.6
	18.8753	19693.6
	18.8754	19903.7
	18.8755	19810.4
	18.8756	20067.2
	18.8757	20190.6
	18.8758	19924
	18.8759	19874.1
	18.876	20400.8
	18.8761	20474.2
	18.8762	20417.6
	18.8763	20527.7
	18.8764	20504.4
	18.8765	20764.5
	18.8766	20487.9
	18.8767	20724.6
	18.8768	21111.4
	18.8769	20971.4
	18.877	21411.5
	18.8771	21634.9
	18.8772	21991.6
	18.8773	21648.4
	18.8774	21901.8
	18.8775	21875.2
	18.8776	21955.3
	18.8777	22205.3
	18.8778	22405.4
	18.8779	22178.8
	18.878	22518.9
	18.8781	22672.3
	18.8782	22385.7
	18.8784	23349.2
	18.8785	23399.2
	18.8786	23052.6
	18.8787	22619.4
	18.8788	23202.8
	18.8789	23142.8
	18.879	23429.6
	18.8791	23909.7
	18.8792	23616.4
	18.8793	24013.1
	18.8794	24183.2
	18.8795	23936.6
	18.8796	24133.3
	18.8797	24596.7
	18.8798	24420.1
	18.8799	24233.6
	18.88	24740.3
	18.8801	24623.7
	18.8802	24567.1
	18.8803	24923.8
	18.8804	24700.6
	18.8805	25307.3
	18.8806	24610.7
	18.8807	24840.8
	18.8808	24714.2
	18.8809	25360.9
	18.881	25317.7
	18.8811	25457.7
	18.8812	25494.5
	18.8813	25547.9
	18.8814	25654.6
	18.8815	25628
	18.8816	26168.1
	18.8817	25831.5
	18.8818	26184.9
	18.8819	25965
	18.882	25998.4
	18.8821	26055.1
	18.8822	26145.2
	18.8823	26625.3
	18.8824	26152
	18.8825	26718.7
	18.8826	26688.8
	18.8827	26715.5
	18.8828	26882.3
	18.8829	26775.7
	18.883	26089.1
	18.8831	26739.2
	18.8832	27082.6
	18.8833	26786
	18.8834	27352.7
	18.8835	27079.4
	18.8836	27472.8
	18.8837	27036.2
	18.8838	27673
	18.8839	27963.1
	18.884	27723.1
	18.8841	27893.2
	18.8842	28149.9
	18.8843	28136.7
	18.8844	28616.7
	18.8845	28163.5
	18.8846	28160.2
	18.8847	28267
	18.8848	28513.7
	18.8849	28407.1
	18.885	28180.5
	18.8851	28567.2
	18.8852	28737.3
	18.8853	28400.7
	18.8854	28547.5
	18.8855	28454.2
	18.8856	28310.9
	18.8857	29031
	18.8858	28784.4
	18.8859	29221.1
	18.886	29274.5
	18.8861	29144.6
	18.8862	28928
	18.8863	28594.8
	18.8864	29364.8
	18.8865	29514.9
	18.8866	29348.3
	18.8867	28998.4
	18.8868	29555.1
	18.8869	29091.9
	18.887	29598.6
	18.8871	29542
	18.8872	29562.1
	18.8873	29875.5
	18.8874	29688.9
	18.8875	30352.3
	18.8876	29409
	18.8877	28805.8
	18.8879	30205.9
	18.888	29662.6
	18.8881	29992.7
	18.8882	30249.4
	18.8883	29899.5
	18.8884	29712.9
	18.8885	30109.7
	18.8886	30606.4
	18.8887	30523.1
	18.8888	30926.5
	18.8889	30513.3
	18.889	30966.7
	18.8891	30930.1
	18.8892	30320.1
	18.8893	30920.2
	18.8894	31083.6
	18.8895	30897
	18.8896	31353.8
	18.8897	30750.5
	18.8898	31717.2
	18.8899	30677.3
	18.89	31030.7
	18.8901	30924.1
	18.8902	31780.9
	18.8903	31440.9
	18.8904	31351
	18.8905	31137.7
	18.8906	31207.8
	18.8907	31251.2
	18.8908	32098
	18.8909	31424.7
	18.891	31714.8
	18.8911	31618.2
	18.8912	31944.9
	18.8913	31618.3
	18.8914	31645
	18.8915	31628.4
	18.8916	32031.9
	18.8917	31418.6
	18.8918	31825.3
	18.8919	31495.4
	18.892	31878.8
	18.8921	31765.5
	18.8922	32678.9
	18.8923	32395.7
	18.8924	32222.4
	18.8925	32422.5
	18.8926	31872.6
	18.8927	32522.6
	18.8928	32192.7
	18.8929	32029.4
	18.893	32182.8
	18.8931	32199.6
	18.8932	32163
	18.8933	32273.1
	18.8934	32073.1
	18.8935	32883.2
	18.8936	32573.3
	18.8937	32390
	18.8938	32443.4
	18.8939	32763.5
	18.894	32816.9
	18.8941	32480.3
	18.8942	32467
	18.8943	32283.8
	18.8944	33100.5
	18.8945	31953.9
	18.8946	33407.3
	18.8947	33617.4
	18.8948	33394.1
	18.8949	32730.9
	18.895	32700.9
	18.8951	32557.7
	18.8952	32981.1
	18.8953	33267.8
	18.8954	32891.2
	18.8955	33511.3
	18.8956	32751.4
	18.8957	33021.4
	18.8958	32898.2
	18.8959	32788.2
	18.896	32858.3
	18.8961	33575
	18.8962	33115.1
	18.8963	33225.2
	18.8964	32845.3
	18.8965	32962
	18.8966	32985.4
	18.8967	33555.5
	18.8968	32962.2
	18.8969	33112.3
	18.897	33152.3
	18.8971	33152.4
	18.8972	34099.2
	18.8974	33442.6
	18.8975	33449.4
	18.8976	33359.4
	18.8977	33626.2
	18.8978	33436.3
	18.8979	33539.7
	18.898	34119.7
	18.8981	33489.8
	18.8982	33456.5
	18.8983	33726.6
	18.8984	33953.3
	18.8985	33763.4
	18.8986	33863.5
	18.8987	33513.6
	18.8988	34063.6
	18.8989	33703.7
[truncated: 1,960 more rows]
